# Supplementary material
Source: Copernicus journal article supplement (doi:10.5194/amt-19-4013-2026)
Supplement: Supplementary file 1 [file amt-19-4013-2026-supplement.pdf]

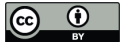

*Supplement of*

**Global and diurnal variations in tropospheric ammonia observed from a constellation of hyperspectral infrared sounders in three different LEO orbits**

**Jiancong Hua et al.**

*Correspondence to:* Zhao-Cheng Zeng (zczeng@pku.edu.cn)

The copyright of individual parts of the supplement might differ from the article licence.

**Text S1. Sensitivity to the NH<sub>3</sub> a priori profile**

For each observation, the spatiotemporally matched NH<sub>3</sub> profile from the GEOS-CF model is selected as the a priori profile. The variable-prior retrievals are then compared with the baseline fixed-prior retrievals over the North China Plain and the Indo-Gangetic Plain for January, April, July, and October, 2024. Three representative days, namely the 5th, 15th, and 25th days of each month are selected. The same strict quality-control filters are applied to both retrieval sets before comparison. The results are shown in Figs. S1–S6. Overall, the fixed-prior and variable-prior retrievals show broadly consistent NH<sub>3</sub> columns after strict filtering, indicating that the main spatial and local-time-dependent patterns discussed in this study are not primarily controlled by the choice between fixed and variable NH<sub>3</sub> a priori profiles.

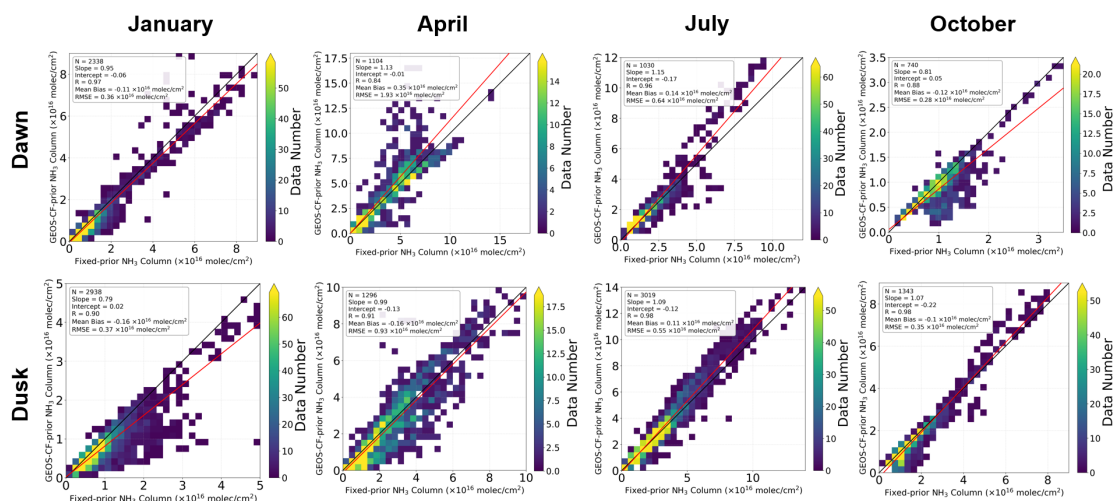

**Figure S1. Comparisons of FY-3E/HIRAS-II retrieved NH<sub>3</sub> columns between the baseline retrieval using a fixed a priori NH<sub>3</sub> profile and the sensitivity retrieval using spatiotemporally matched GEOS-CF NH<sub>3</sub> profiles as variable a priori profiles over the North China Plain (25°N–45°N, 110°E–130°E). Results are shown for selected days in January, April, July, and October 2024, including the 5th, 15th, and 25th days of each month. The black solid line represents the 1:1 line, and the red solid line indicates the orthogonal distance regression (ODR) fit. The slope, intercept, correlation coefficient (R), root mean square error (RMSE), mean bias (calculated as the GEOS-CF-prior retrieval minus the fixed-prior retrieval), and number of samples are also provided.**

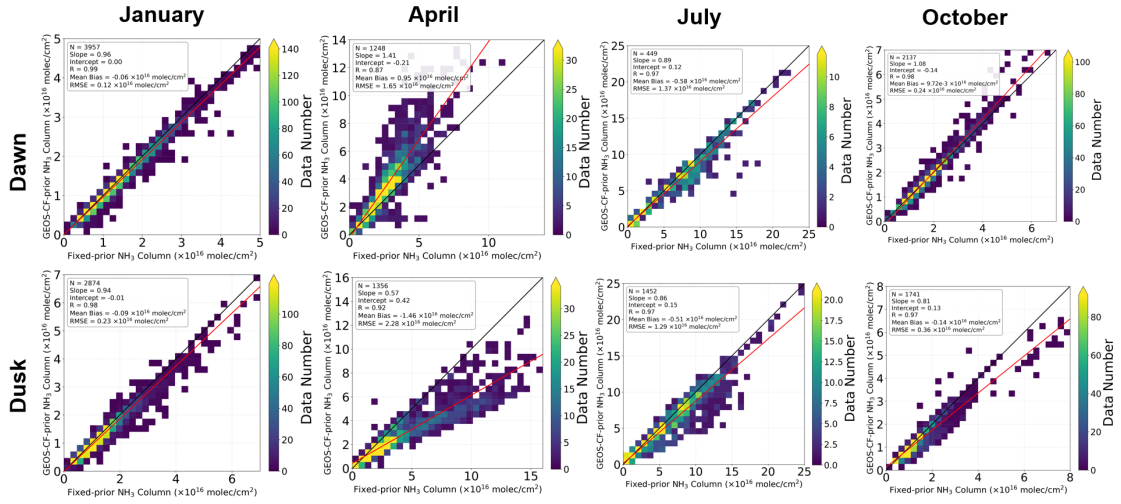

Figure S2. Same as Fig. S1, but for FY-3E/HIRAS-II over the Indo-Gangetic Plain (15°N–35°N, 65°E–95°E).

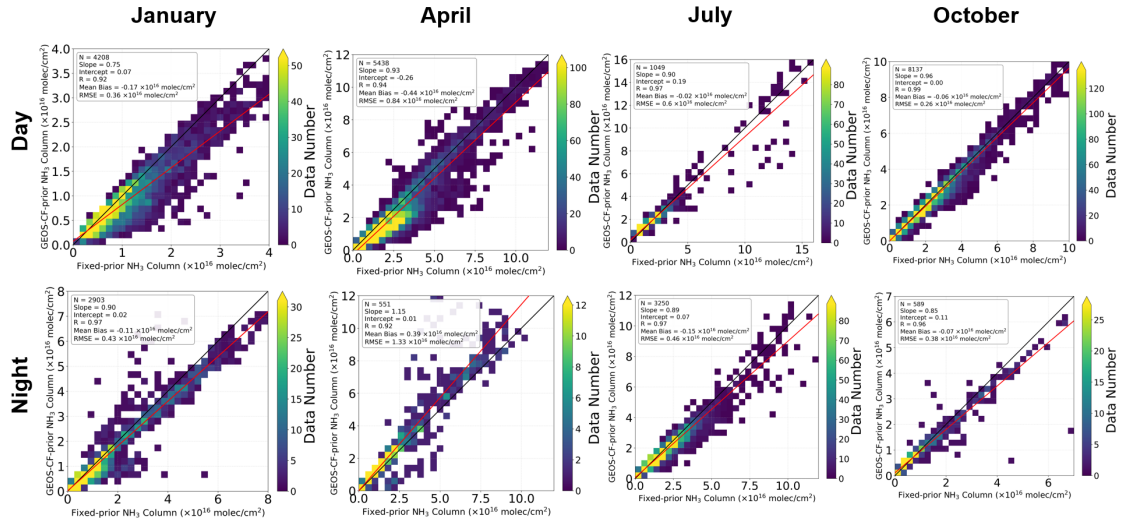

Figure S3. Same as Fig. S1, but for FY-3F/HIRAS-II over the North China Plain (25°N–45°N, 110°E–130°E).

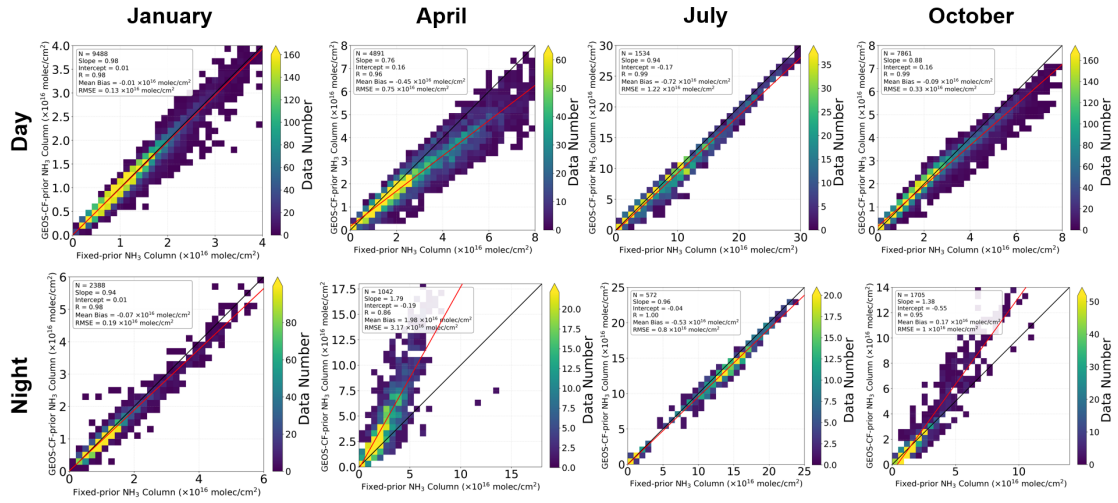

Figure S4. Same as Fig. S1, but for FY-3F/HIRAS-II over the Indo-Gangetic Plain (15°N–35°N, 65°E–95°E).

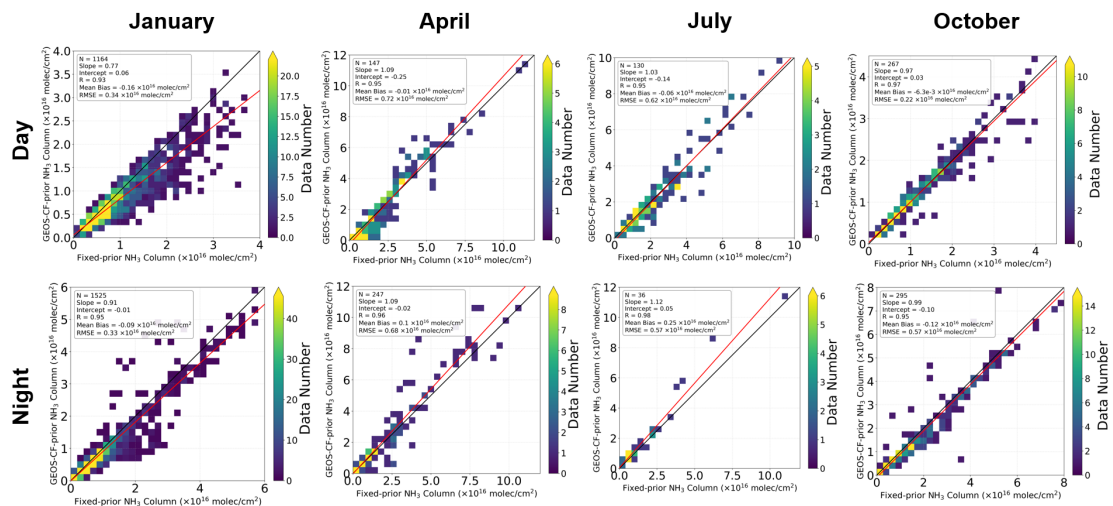

Figure S5. Same as Fig. S1, but for CrIS over the North China Plain (25°N–45°N, 110°E–130°E).

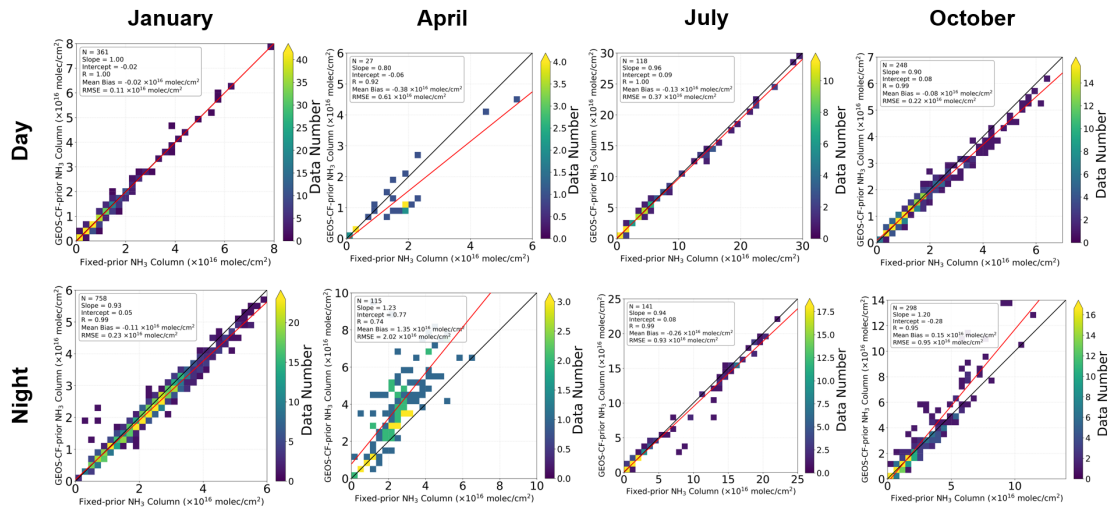

Figure S6. Same as Fig. S1, but for CrIS over the Indo-Gangetic Plain (15°N–35°N, 65°E–95°E).

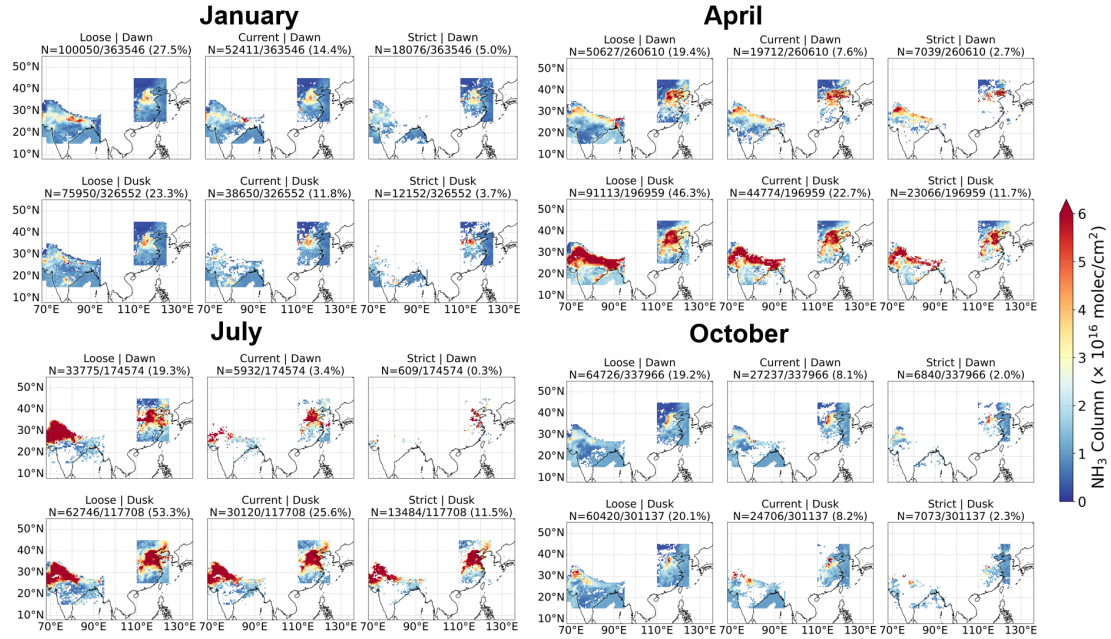

**Figure S7. Sensitivity of FY-3E/HIRAS-II  $\text{NH}_3$  spatial distributions to filtering criteria over (a) the North China Plain and (b) the Indo-Gangetic Plain. The three columns correspond to the loose filter, current hotspot filter, and strict filter, respectively. N values in the subpanel titles are given as retained retrievals / raw retrievals after applying the corresponding filter, with the retained percentage shown.**

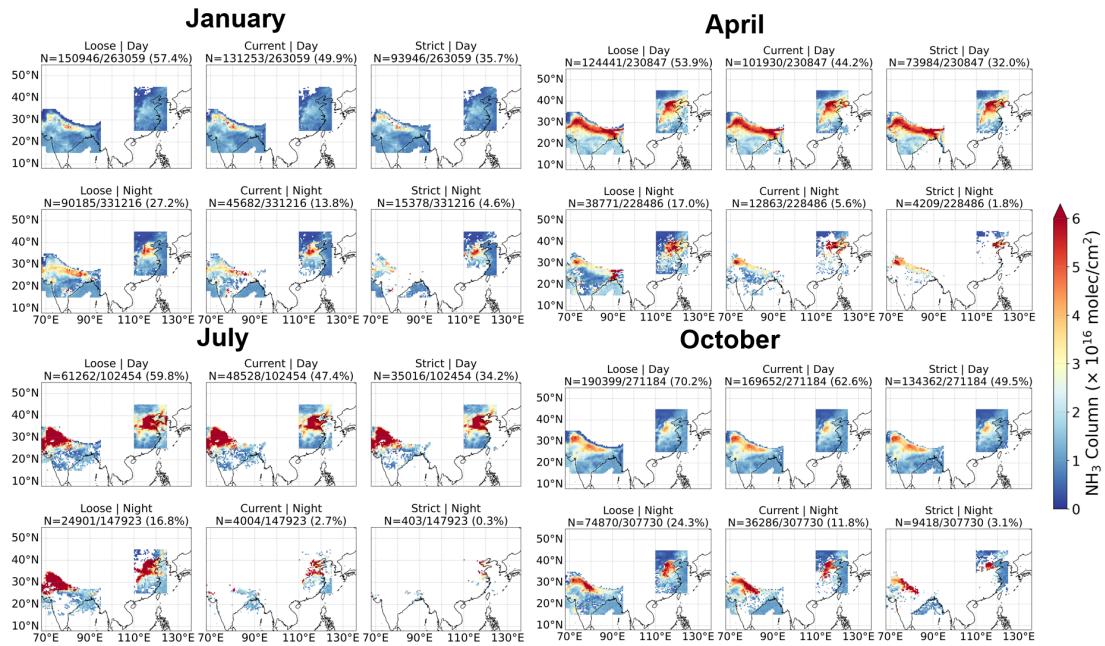

**Figure S8. Same as Fig. S7, but for FY-3F/HIRAS-II.**

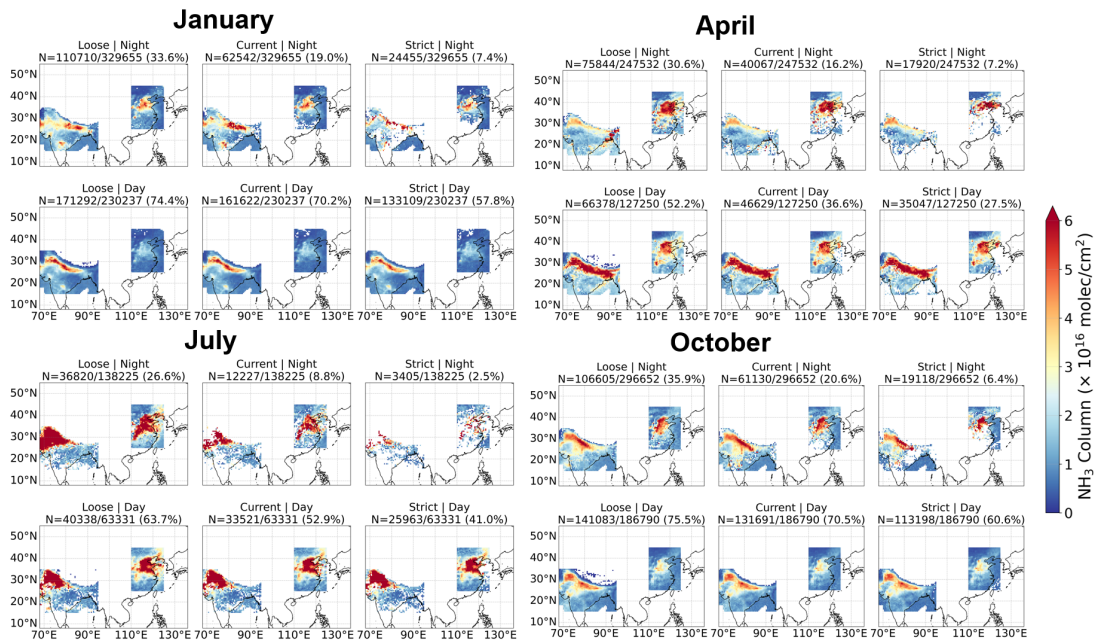

**Figure S9.** Same as Fig. S7, but for CrIS.

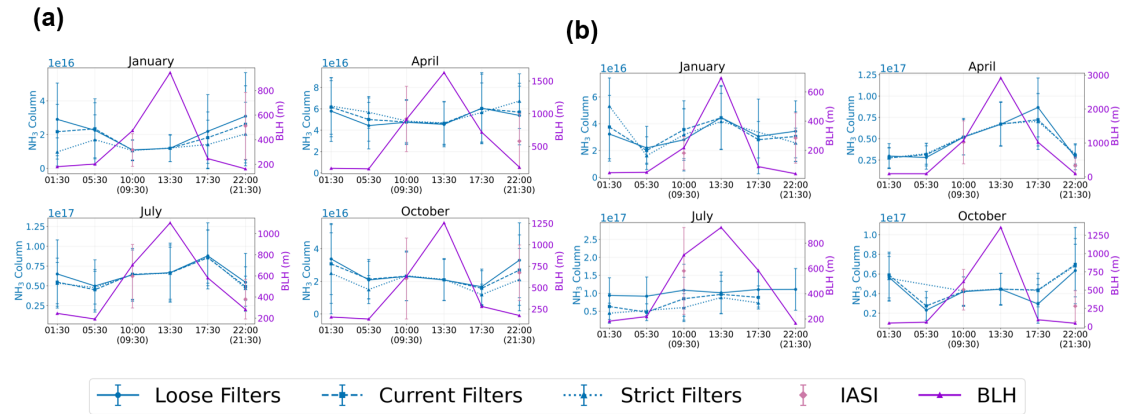

**Figure S10. Sensitivity of regional  $\text{NH}_3$  diurnal cycles to filtering criteria over (a) the North China Plain ( $37^\circ\text{N}$ ,  $118^\circ\text{E}$ ) and (b) the Indo-Gangetic Plain ( $28^\circ\text{N}$ ,  $78^\circ\text{E}$ ). The loose, current, and strict filters correspond to surface AVK  $> 0.1$  and absolute TC  $> 3$  K, surface AVK  $> 0.3$  and absolute TC  $> 5$  K, and surface AVK  $> 0.4$  and absolute TC  $> 7$  K, respectively.**

**Table S1. Parameters in the state vector to be retrieved from the FY-LeoAIR NH<sub>3</sub> retrieval algorithm.**

| Variable                             | Number of variables | A priori values            | A priori error              |
|--------------------------------------|---------------------|----------------------------|-----------------------------|
| NH <sub>3</sub>                      | 1                   | GEOS-CF simulations        | 350%                        |
| H <sub>2</sub> O                     | 1                   | ECMWF ERA5                 | 30%                         |
| O <sub>3</sub>                       | 1                   | ECMWF ERA5                 | 10%                         |
| CO <sub>2</sub>                      | 1                   | ECMWF CAMS                 | 5%                          |
| HNO <sub>3</sub>                     | 1                   | LBLRTM Standard Atmosphere | 10%                         |
| N <sub>2</sub> O                     | 1                   | LBLRTM Standard Atmosphere | 10%                         |
| CFC-12                               | 1                   | LBLRTM Standard Atmosphere | 20%                         |
| Surface skin temperature             | 1                   | ECMWF ERA5                 | 5 K                         |
| Air temperature profile              | 1                   | ECMWF ERA5                 | 0.5%                        |
| Scale factors for surface emissivity | 4                   | [0.0,0.0,0.0,0.0]          | [0.1%,0.01%,0.001%,0.0001%] |

Notes: LBLRTM Standard Atmosphere data are from

<https://github.com/ReFRACtor/ABSCO/tree/master/VMR> (last access: 14 June 2026). The a priori surface emissivity spectrum is taken from the emissivity database and is adjusted using a multiplicative Legendre polynomial expansion. Four coefficients corresponding to the first- to fourth-order terms are retrieved, while the zeroth-order term is fixed to unity and is not included in the state vector.

**Table S2. Number of quality-controlled retrievals used to calculate the monthly means in Fig. 9.**

| Region              | Month   | 01:30 | 05:30 | 10:00 | 13:30 | 17:30 | 22:00 |
|---------------------|---------|-------|-------|-------|-------|-------|-------|
| North China Plain   | January | 238   | 457   | 937   | 1524  | 296   | 431   |
|                     | April   | 176   | 157   | 1306  | 621   | 946   | 127   |
|                     | July    | 137   | 227   | 1077  | 807   | 900   | 227   |
|                     | October | 263   | 301   | 1401  | 1607  | 380   | 346   |
| Indo-Gangetic Plain | January | 421   | 200   | 101   | 1606  | 16    | 306   |
|                     | April   | 1103  | 907   | 1701  | 389   | 188   | 824   |
|                     | July    | 339   | 31    | 291   | 249   | 444   | 0     |
|                     | October | 1462  | 97    | 3527  | 2032  | 136   | 596   |
| Central U.S.        | January | 528   | 646   | 326   | 1279  | 274   | 470   |
|                     | April   | 400   | 386   | 979   | 804   | 231   | 795   |
|                     | July    | 209   | 60    | 2041  | 975   | 582   | 64    |
|                     | October | 823   | 938   | 1862  | 1777  | 33    | 983   |
